# Supplementary material for: Psychological Impact of the Lockdown Due to the COVID-19 Pandemic in University Workers: Factors Related to Stress, Anxiety, and Depression
Source: MDPI journal article supplement (doi:10.3390/ijerph18084367), 2021-04-20
Supplement: s1 [file s1]

Table S1. Brief COPE 28 internal structure.

| Dimension                                          | Subscale                    | Subscale definition                                                                                            |
|----------------------------------------------------|-----------------------------|----------------------------------------------------------------------------------------------------------------|
| Dimension 1,<br>Emotion-focused<br>strategies      | 4. Emotional support        | Getting emotional support/comfort and understanding.                                                           |
|                                                    | 8. Positive reframing       | Trying to see it in a different light, make it seem more positive/ look for something good in it.              |
|                                                    | 10. Acceptance              | Accepting the reality that it has happened/ learning to live with it.                                          |
|                                                    | 11. Religion                | Finding comfort in religious or spiritual beliefs/ praying or meditating.                                      |
|                                                    | 13. Humor                   | Making jokes about the stressor/making fun on the situation.                                                   |
| Dimension 2,<br>Problem-focused<br>strategies      | 1. Active coping            | Concentrating my efforts on doing something about the situation I'm in/ taking action to try to make it better |
|                                                    | 2. Planning                 | Trying to come up with a strategy about what to do/ thinking hard about what steps to take.                    |
|                                                    | 3. Instrumental support     | Getting help and advice from other people/ trying to get advice or help from others about what to do.          |
| Dimension 3,<br>Dysfunctional<br>coping strategies | 5. Self-distraction         | Turning to work or other activities to take my mind off things/ doing something to think about it less.        |
|                                                    | 6. Venting                  | Saying things to let unpleasant feelings escape/ expressing negative feelings                                  |
|                                                    | 7. Behavioral disengagement | giving up trying to deal with it/ the attempt to cope.                                                         |
|                                                    | 9. Denial                   | Saying to myself "this isn't real" /refusing to believe that it has happened.                                  |
|                                                    | 12. Substance use           | Using alcohol or other drugs to make myself feel better/ to help me get through it                             |
|                                                    | 14. Self-blame              | Criticizing myself/ blaming myself for things that happened.                                                   |

Source: Cooper, C.; Katona, C.; Livingston, G. Validity and reliability of the brief cope in carers of people with dementia: 333 The LASER-AD study. *J. Nerv. Ment. Dis.* 2008, 196, 838–843, doi:10.1097/NMD.0b013e31818b504c.
